# Supplementary material
Source: MDPI journal article supplement (https://www.mdpi.com/2073-445X/12/3/592)
Supplement: s1 [file s1]

**Table S1.** Business performance of each business in SFT2 scenerio (1000 yen).

|                          | RFD     | OBD         |                         |                    |                   |                  | Total   |
|--------------------------|---------|-------------|-------------------------|--------------------|-------------------|------------------|---------|
|                          |         | Minor Total | Contracting<br>Business | Bean<br>Production | Processed<br>Food | Dealing<br>Crops |         |
| 1:Sales                  | 11,168  | 13,629      | 2815                    | 123                | 2861              | 7830             | 24,798  |
| 2:Expense (3+4+5)        | 21,453  | 14,277      | 3289                    | 141                | 4091              | 6757             | 35,700  |
| 3:fixed cost             | 10,093  | 221         | 0                       | 0                  | 221               | 0                | 10,284  |
| depreciation cost        | 8477    | 221         | 0                       | 0                  | 221               | 0                | 8667    |
| taxes and dues           | 225     | 0           | 0                       | 0                  | 0                 | 0                | 225     |
| land rent                | 766     | 0           | 0                       | 0                  | 0                 | 0                | 766     |
| insurance                | 626     | 0           | 0                       | 0                  | 0                 | 0                | 626     |
| 4:variable cost          | 6740    | 8282        | 515                     | 19                 | 1049              | 6699             | 15,023  |
| seed                     | 1744    | 7           | 0                       | 7                  | 0                 | 0                | 1751    |
| fertilizer               | 139     | 10          | 0                       | 10                 | 0                 | 0                | 149     |
| cheminal                 | 978     | 2           | 0                       | 2                  | 0                 | 0                | 980     |
| fuel and utility costs   | 95      | 495         | 411                     | 0                  | 85                | 0                | 590     |
| farming implements cost  | 571     | 91          | 62                      | 0                  | 29                | 0                | 662     |
| repair expense           | 1020    | 154         | 42                      | 0                  | 113               | 0                | 1174    |
| factory supplies expense | 86      | 371         | 0                       | 0                  | 371               | 0                | 457     |
| commissioned work        | 2108    | 0           | 0                       | 0                  | 0                 | 0                | 2108    |
| others inputs            | 0       | 7152        | 0                       | 0                  | 452               | 6699             | 7152    |
| 5:labor cost             | 4619    | 5774        | 2774                    | 121                | 2821              | 58               | 10,393  |
| (Labor hours*1)          | 1600    | 2000        | 961                     | 42                 | 977               | 20               | 3600    |
| 6: Gross income (1-2)    | -10,285 | -648        | -474                    | -17                | -1230             | 1073             | -10,933 |
| 7: Subsidies             | 8938    |             |                         |                    |                   |                  | 8938    |
| 8: Ordinary profit (6+7) | -1347   | -648        | -474                    | -17                | -1230             | 1073             | -1995   |

Source: accounting book (2020) and interview .
